# Supplementary material
Source: PubMed Central journal article supplement (PMC3472449)
Supplement: NIHMS412594-supplement-primers.pdf [file NIHMS412594-supplement-primers.pdf]

Supplement Table 1 — PCR Primers

**ChIP Primers**

| Location on Ch16* | primer     |         | Sequence                    |
|-------------------|------------|---------|-----------------------------|
| 10,468,811        | Y1         | Forward | 5-CAAGTCAGCGTGAGGCATGG      |
| 10,468,902        |            | Reverse | 5-GGCAATGGCGGCACTAAGG       |
| 10,469,536        | Y2         | Forward | 5-GGCAGCAGGCAGCAAAGC        |
| 10,469,696        |            | Reverse | 5-TCCAGCAGGTGAGGCAAGG       |
| 10,470,554        | Y3         | Forward | 5-GGACACTGGCTGCTGATGC       |
| 10,470,660        |            | Reverse | 5-GCTTGCTTGCTTGATTGATTGATG  |
| 10,471,497        | Y4         | Forward | 5-TAAAGGCAAAGAGAGGGACAAAGG  |
| 10,471,616        |            | Reverse | 5-GGCAAGCAACAACAGGAGAAATC   |
| 10,472,687        | Y5         | Forward | 5-CCTGTCTGTCTGTCACCTACC     |
| 10,472,841        |            | Reverse | 5-GCTATGCTGGCGGCTGTC        |
| 10,473,738        | Y6         | Forward | 5-TAGCACATAACAGCGGTAGATTAC  |
| 10,473,835        |            | Reverse | 5-CCCAAGTTTGAGACAAGCAGAC    |
| 10,474,409        | Y7         | Forward | 5-CTCTGATGTCTTGATGGTGCTAAC  |
| 10,474,579        |            | Reverse | 5-TCCTCCTGCCACACTCTCC       |
| 10,475,654        | Y8         | Forward | 5-ACTCTGGTGCCTACTCTGTTG     |
| 10,475,807        |            | Reverse | 5-AAGGGTGGTGTGGTTGCG        |
| 10,476,378        | Y9 (HSS1)  | Forward | 5-CCCGAAGCCAGTGAGAACC       |
| 10,476,481        |            | Reverse | 5-TGTGTCTGTGTGTTTGTATGTAGG  |
| 10,479,684        | Y10        | Forward | 5-TTGTGAGGCAGTCTTGTGTAGC    |
| 10,479,795        |            | Reverse | 5-AAGTGGGAATGGCGATATGAGC    |
| 10,480,035        | Y11 (pl)   | Forward | 5-CTTATTGCTGTCCAAGTCACCCC   |
| 10,480,174        |            | Reverse | 5-TCCAGCCTTGCAGCATCCAAA     |
| 10,480,374        | Y12        | Forward | 5-TGAGCCTGATGGTGATGC        |
| 10,480,542        |            | Reverse | 5-TGGTCATACATTGTTGCCTTG     |
| 10,481,600        | Y13        | Forward | 5-TTGGGTGCTGAGTATGGGAGTC    |
| 10,481,745        |            | Reverse | 5-GCTGGTGGAGTGAGGGATGG      |
| 10,482,464        | Y14        | Forward | 5-GTGCTTCTCCTGGGACAATGG     |
| 10,482,613        |            | Reverse | 5-AAGGAACCAGCGTACTCAGAAC    |
| 10,483,370        | Y15        | Forward | 5-GTTGTCCGACGGCTCCAG        |
| 10,483,501        |            | Reverse | 5-CCCTTCTAGCTCTCCCTTCC      |
| 10,484,196        | Y16        | Forward | 5-CAGCCTGCTATGTATCCTCTTG    |
| 10,484,373        |            | Reverse | 5-GCAATAGCTTGGAGTAGGTAGG    |
| 10,485,287        | Y14        | Forward | 5-TCTACATCTCCAGCGTCATCC     |
| 10,485,455        |            | Reverse | 5-TGTGCTGTTACCTGGTCTCC      |
| 10,486,867        | Y18        | Forward | 5-CACAGTGATGCCAGTCTAGG      |
| 10,487,003        |            | Reverse | 5-CACACGATGCCCAAGTCC        |
| 10,488,157        | Y19 (pIII) | Forward | 5-GCCACAAGAAGGAACTGAAATTAAC |
| 10,488,305        |            | Reverse | 5-AGGAGCCCAGAACCTACCAAGC    |
| 10,488,576        | Y20        | Forward | 5-CTTGGGTGGTTTCAGCATTCC     |
| 10,488,693        |            | Reverse | 5-TTAAGGAAGAGGAGAAGGAAGAGG  |
| 10,489,114        | Y21        | Forward | 5-ATCTGGCACCGTGAAGTAACC     |
| 10,489,265        |            | Reverse | 5-CCTTCTCTTCCACCCTGAACC     |
| 10,489,917        | Y22 (pIV)  | Forward | 5-GCAGGCAGCACTCAGAAGC       |
| 10,489,988        |            | Reverse | 5-TCGGATTCCCAACCTAACTTAGC   |
| 10,490,100        | Y23        | Forward | 5-GGATCTTGGACGGACTGTATGC    |
| 10,490,176        |            | Reverse | 5-CGCCACTTGCCTTCACTACC      |

**BAC modification and real time RT-PCR primers for Figure 4**

| Chromosome 16 | Primer | Sequence                  |
|---------------|--------|---------------------------|
| 10,488,421    | P1     | 5-GCAGCTGGACTACAGACGTTAC  |
| 10,489,907    | P2     | 5-GAGACTGCATGCAGGCAGCA    |
| 10,501,917    | P3     | 5-GGTCGGCATCACTGTTAAGGA   |
| 10,475,771    | P4     | 5-ACAATTGCTGTAGATATGCGCAA |
| 10,477,949    | P5     | 5-ATTTCCCTCTGTGGACCTGTCAT |
| 10,487,571    | P6     | 5-GGTATGCATGACCACATCACA   |
| 10,488,770    | P7     | 5-TACTCAAAGACAGAAATAGGC   |
| 10,480,334    | P8     | 5-AAGAGCTGCTCTCACGGGAAT   |

**RT PCR primers**  
for Figure 5

| Target |         | Sequence                      |
|--------|---------|-------------------------------|
| I-A    | Forward | 5-GACGCAGCGCATACGGCTC         |
|        | Reverse | 5-CCGCCGCAGGGAGGTGCT          |
| CD19   | Forward | 5-AGGACTGGAAGAAGAAGG          |
|        | Reverse | 5-TCATAAGACTCAGCATTGG         |
| Pax5   | Forward | 5-CTCCCAGATGTAGTCCGCCAAAG     |
|        | Reverse | 5-GCTTGATGCTTCCTGTCTCATAATACC |
| SpiC   | Forward | 5-AACACTCGCTGAACTCTGG         |
|        | Reverse | 5-GCCTCGCTGAACTGGTAG          |
| SpiB   | Forward | 5-AGGACTTCACCAGCCAGACC        |
|        | Reverse | 5-TCGGAGCCAGCCAAGAGG          |

**Chromatin Conformation Capture (3C) assay primers**

| Chromosome 16 | Primer | Sequence                    |
|---------------|--------|-----------------------------|
| 10,452,430    | H1     | 5-ACTGCTCTGGAAGAATGAATGTAAC |
| 10,476,826    | H2     | 5-GGAGAGCAGGTAGGTCTGATATAG  |
| 10,480,375    | H3     | 5-TGAGCCTGATGGTGATGC        |
| 10,487,991    | H4     | 5-AGCTCCAGCTTCTGCTCGCAG     |
| 10,488,572    | H5     | 5-AGGTCTTGGGTGGTTTCAG       |
| 10,487,855    | pIII   | 5-TTCAGGGTTGTGGTGGTAGG      |
| 10,488,692    | H6     | 5-TCCTCTTCTCTCTCTCTTC       |
| 10,518,117    | H7     | 5-TCTGCCCTTGTGGTTTCG        |

**HindIII accessibility**

| Chromosome 16 | Primer | Sequence                            |
|---------------|--------|-------------------------------------|
| 10,473,410    | S1     | 5-CTCAGGCTTCCTTCCAAGTCTATTTCTAACTTG |
| 10,473,666    | S2     | 5-GTATATCCACACTGGCCTTGAATCC         |
| 10,474,012    | S3     | 5-GCAATGCTAGGCTCTTAAGGCAGACCGGA     |
| 10,474,383    | S4     | 5-GAGAGTAGATGACATCACTTCAGTCGACT     |
| 10,476,645    | S5     | 5-AGTGTCTGACAGAAGTCCATAATGG         |
| 10,476,987    | S6     | 5-CTATACATGCAAGTATAGTAGACAC         |
| 10,480,432    | S7     | 5-GACTTAGACTTGACTTTCTTGAGCTGGGTCT   |
| 10,480,787    | S8     | 5-TAGATGGTGTGTCTGTTGGAAGCAG         |
| 10,487,548    | S9     | 5-ACATTCTACACTGTGGTATTACAGGTATGCATG |
| 10,488,610    | S10    | 5-AATCTGCACCATGACTTCCAGGGGCCTCT     |
| 10,489,016    | S11    | 5-AACTGAGACTAAGAACGGTAATT           |

\*Position relative to the University California Santa Cruz Genome Browser Build July 2007
