# Supplementary material
Source: PubMed Central journal article supplement (PMC3472449)

A

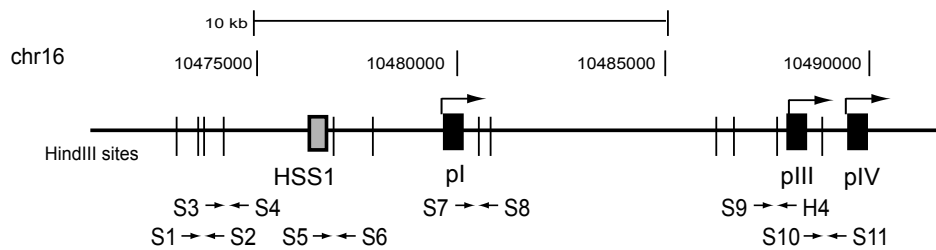

B

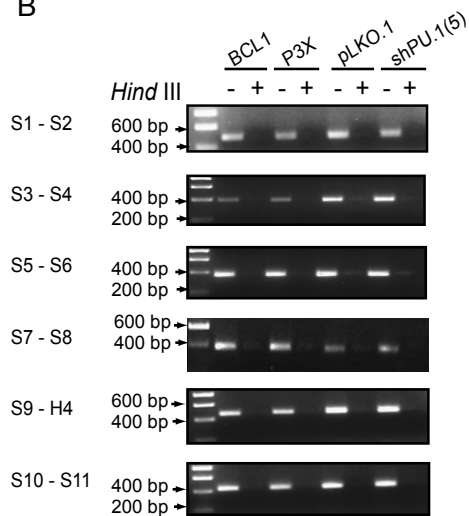

C

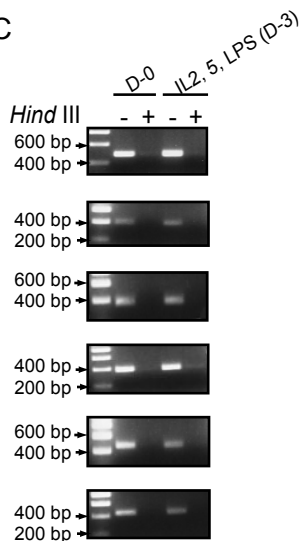

Supplement: NIHMS412594-supplement-sup_fig_1.pdf [file NIHMS412594-supplement-sup_fig_1.pdf]
